# Supplementary material for: Inflation Pressure in Side Branch during Modified Jailed Balloon Technique Does Not Affect Side Branch Outcomes
Source: Hindawi journal article supplement (doi:10.1155/2021/8839897), 2021-02-18

|   | A  | B  | Fisher検定 p値 |
|---|----|----|-------------|
| F | 8  | 5  | 1           |
| M | 22 | 16 |             |

|     |   |   |       |
|-----|---|---|-------|
| ACS | 9 | 4 | 0.724 |
| AP  | 9 | 7 |       |
| OMI | 3 | 4 |       |
| SMI | 9 | 6 |       |

|     |    |    |       |
|-----|----|----|-------|
| ACS | 9  | 4  | 0.717 |
| AP  | 9  | 7  |       |
| SMI | 12 | 10 |       |

|        |    |    |       |
|--------|----|----|-------|
| HT (-) | 9  | 5  | 0.754 |
| HT(+)  | 21 | 16 |       |

|       |    |    |       |
|-------|----|----|-------|
| DM(-) | 18 | 11 | 0.774 |
| DM(+) | 12 | 10 |       |

|       |    |    |       |
|-------|----|----|-------|
| DL(-) | 14 | 11 | 0.779 |
| DL(+) | 16 | 10 |       |

|          |    |    |       |
|----------|----|----|-------|
| smoke(-) | 19 | 17 | 0.221 |
| smoke(+) | 11 | 4  |       |

|       |    |    |       |
|-------|----|----|-------|
| HD(-) | 29 | 19 | 0.561 |
| HD(+) | 1  | 2  |       |

|        |    |    |       |
|--------|----|----|-------|
| Af (-) | 25 | 15 | 0.327 |
| Af (+) | 5  | 6  |       |

|        |    |    |       |
|--------|----|----|-------|
| CVD(-) | 25 | 15 | 0.327 |
| CVD(+) | 5  | 6  |       |

|        |    |    |   |
|--------|----|----|---|
| PAD(-) | 25 | 18 | 1 |
| PAD(+) | 5  | 3  |   |

|        | A  | B  | Fisher検定 p値 |
|--------|----|----|-------------|
| CCB(-) | 15 | 7  | 0.266       |
| CCB(+) | 15 | 14 |             |

|         |    |    |   |
|---------|----|----|---|
| ACEi(-) | 17 | 12 | 1 |
| ACEi(+) | 13 | 9  |   |

|       |    |    |        |
|-------|----|----|--------|
| BB(-) | 26 | 13 | 0.0515 |
| BB(+) | 4  | 8  |        |

|         |    |    |       |
|---------|----|----|-------|
| Loop(-) | 26 | 15 | 0.283 |
| Loop(+) | 4  | 6  |       |

|           |    |    |   |
|-----------|----|----|---|
| Spiron(-) | 28 | 20 | 1 |
| Spiron(+) | 2  | 1  |   |

|            |    |    |       |
|------------|----|----|-------|
| Statin (-) | 19 | 10 | 0.389 |
| Statin (+) | 11 | 11 |       |

|             |    |    |       |
|-------------|----|----|-------|
| Insulin (-) | 29 | 18 | 0.293 |
| Insulin (+) | 1  | 3  |       |

|        |    |    |       |
|--------|----|----|-------|
| ASA(-) | 0  | 1  | 0.412 |
| ASA(+) | 30 | 20 |       |

|          |    |    |        |
|----------|----|----|--------|
| Plasg(-) | 5  | 9  | 0.0572 |
| Plasg(+) | 25 | 12 |        |

|           |    |    |        |
|-----------|----|----|--------|
| Clopid(-) | 25 | 12 | 0.0572 |
| Clopid(+) | 5  | 9  |        |

|         |    |    |       |
|---------|----|----|-------|
| DOAC(-) | 28 | 17 | 0.214 |
| DOAC(+) | 2  | 4  |       |

| WBC | 平均       | 標準偏差     | p値    |
|-----|----------|----------|-------|
| A   | 7152.333 | 2615.301 | 0.968 |
| B   | 7114.286 | 4162.486 |       |

|     |          |          |        |
|-----|----------|----------|--------|
| Hgb | 13.74    | 1.725189 | 0.0417 |
|     | 12.52381 | 2.433907 |        |

|     |          |          |       |
|-----|----------|----------|-------|
| Plt | 227.6    | 63.74118 | 0.688 |
|     | 220.0952 | 67.35793 |       |

|      |          |          |       |
|------|----------|----------|-------|
| Egfr | 69.46    | 26.0865  | 0.123 |
|      | 56.35714 | 33.55367 |       |

|     |          |           |        |
|-----|----------|-----------|--------|
| Alb | 3.986667 | 0.5781858 | 0.0751 |
|     | 3.685714 | 0.5867587 |        |

|    |          |          |       |
|----|----------|----------|-------|
| BS | 144.0667 | 66.96625 | 0.923 |
|    | 146.0952 | 80.98945 |       |

|     |          |          |       |
|-----|----------|----------|-------|
| HDL | 50.06    | 19.30357 | 0.236 |
|     | 44.39524 | 11.52937 |       |

|     |          |          |       |
|-----|----------|----------|-------|
| LDL | 108.83   | 33.78936 | 0.366 |
|     | 99.32381 | 29.53892 |       |

|     |          |          |       |
|-----|----------|----------|-------|
| BNP | 239.3567 | 474.0407 | 0.135 |
|     | 523.9952 | 857.4611 |       |

|     |          |          |       |
|-----|----------|----------|-------|
| CRP | 0.55     | 1.150337 | 0.184 |
|     | 1.390952 | 3.141579 |       |

|    |      |          |       |
|----|------|----------|-------|
| 年齢 | 73.9 | 12.20613 | 0.585 |
|    | 72   | 12.05819 |       |

F検定 p値

0.0222

0.0888

0.77

0.211

0.923

0.343

0.0195

0.538

0.00372

0.00000174

0.973

|        | A  | B  | Fisher検定 p値 |
|--------|----|----|-------------|
| LAD-D1 | 14 | 13 | 0.756       |
| LAD-D2 | 9  | 5  |             |
| LAD-D3 | 1  | 1  |             |
| LCX    | 2  | 1  |             |
| LMT    | 3  | 0  |             |
| RCA-RV | 1  | 1  |             |

|     |    |    |       |
|-----|----|----|-------|
| LAD | 24 | 19 | 0.613 |
| LCX | 2  | 1  |       |
| LMT | 3  | 0  |       |
| RCA | 1  | 1  |       |

|       |    |    |   |
|-------|----|----|---|
| 1,1,1 | 18 | 14 | 1 |
| 1,1,0 | 1  | 1  |   |
| 1,0,1 | 4  | 2  |   |
| 0,1,1 | 6  | 4  |   |
| 0,0,1 | 1  | 0  |   |

|         |    |    |       |
|---------|----|----|-------|
| MV calc |    |    |       |
| +       | 22 | 14 | 0.757 |
| －       | 8  | 7  |       |

|          |    |    |   |
|----------|----|----|---|
| IVUS     | 22 | 16 | 1 |
| OCT/OFDI | 8  | 5  |   |

|     |    |    |       |
|-----|----|----|-------|
| 6Fr | 22 | 21 | 0.015 |
| 7Fr | 8  | 0  |       |

|    |    |    |       |
|----|----|----|-------|
| CB |    |    |       |
| +  | 16 | 10 | 0.779 |
| －  | 14 | 11 |       |

|    |    |    |       |
|----|----|----|-------|
| SC |    |    |       |
| +  | 3  | 1  | 0.634 |
| －  | 27 | 20 |       |

|                  |    |    |   |
|------------------|----|----|---|
| Lesion prep (SB) |    |    |   |
| +                | 11 | 7  | 1 |
| －                | 19 | 14 |   |

|            |    |   |       |
|------------|----|---|-------|
| Stent      | A  | B | 0.142 |
| BIOFREED   | 1  | 0 |       |
| Orsiro     | 2  | 6 |       |
| Resolute C | 2  | 1 |       |
| SYNERGY    | 12 | 3 |       |
| Ultimaster | 4  | 4 |       |
| Xience     | 9  | 7 |       |

| Diameter (MV) | 平均       | 標準偏差     | p値    |
|---------------|----------|----------|-------|
| A             | 2.642857 | 0.307533 | 0.772 |
| B             | 2.619048 | 0.245192 |       |

|               |          |          |       |
|---------------|----------|----------|-------|
| Diameter (SB) |          |          |       |
| A             | 1.886364 | 0.376889 | 0.249 |
| B             | 2.071429 | 0.188982 |       |

|     |
|-----|
| JBT |
|-----|

|                  |          |          |       |
|------------------|----------|----------|-------|
| Diameter (stent) |          |          |       |
| A                | 2.941667 | 0.357695 | 0.296 |
| B                | 2.833333 | 0.365148 |       |

|                |          |          |       |
|----------------|----------|----------|-------|
| length (stent) |          |          |       |
| A              | 25.83333 | 7.386303 | 0.957 |
| B              | 25.71429 | 8.05694  |       |

|               |         |          |       |
|---------------|---------|----------|-------|
| pressure (MV) |         |          |       |
| A             | 10.8    | 1.864366 | 0.371 |
| B             | 11.2381 | 1.445848 |       |

|               |          |          |       |
|---------------|----------|----------|-------|
| Diameter (JB) |          |          |       |
| A             | 1.641667 | 0.319505 | 0.416 |
| B             | 1.714286 | 0.298807 |       |

|             |          |          |       |
|-------------|----------|----------|-------|
| length (JB) |          |          |       |
| A           | 12.26667 | 1.779836 | 0.882 |
| B           | 12.33333 | 1.197219 |       |

|               |          |          |          |
|---------------|----------|----------|----------|
| pressure (SB) |          |          |          |
| A             | 10.8     | 1.864366 | 5.23E-12 |
| B             | 5.428571 | 2.378475 |          |

|           |          |          |       |
|-----------|----------|----------|-------|
| Inf. Time |          |          |       |
| A         | 2.533333 | 0.681445 | 0.957 |
| B         | 2.52381  | 0.511766 |       |

|        |        |               |    |    |        |
|--------|--------|---------------|----|----|--------|
| F検定 p値 |        |               |    |    |        |
|        | 0.3    | GW recross    |    |    |        |
|        |        | +             | 29 | 20 | 1      |
|        |        | −             | 1  | 1  |        |
|        | 0.105  | SB dilatation |    |    |        |
|        |        | +             | 24 | 13 | 0.207  |
|        |        | −             | 6  | 8  |        |
|        | 0.901  | Final KBT     |    |    |        |
|        |        | +             | 20 | 8  | 0.0522 |
|        |        | −             | 10 | 13 |        |
|        | 0.656  | KBT/POT       |    |    |        |
|        |        | +             | 21 | 10 | 0.148  |
|        | 0.24   | −             | 9  | 11 |        |
|        |        | KBT           |    |    |        |
|        | 0.767  | +             | 20 | 8  | 0.0522 |
|        |        | −             | 10 | 13 |        |
|        | 0.0691 | POT           |    |    |        |
|        |        | +             | 6  | 2  | 0.445  |
|        |        | −             | 24 | 19 |        |
|        | 0.226  |               |    |    |        |
|        |        |               |    |    |        |
|        | 0.186  |               |    |    |        |
|        |        |               |    |    |        |

|                                 | A  | B  |
|---------------------------------|----|----|
| SB compromise (+)               | 9  | 7  |
| SB compromise (－)               | 21 | 14 |
|                                 |    |    |
| dissection (+)                  | 7  | 7  |
| dissection (－)                  | 23 | 14 |
|                                 |    |    |
| stenosis increase (+)           | 3  | 2  |
| stenosis increase (－)           | 27 | 19 |
|                                 |    |    |
| dissection (-)                  | 23 | 14 |
| dissection (os)                 | 5  | 4  |
| dissection (body)               | 1  | 2  |
| dissection (distal edge)        | 1  | 1  |
|                                 |    |    |
| Temporary SB TIMI flow <grade 3 |    |    |
| (-)                             | 1  | 2  |
| (+)                             | 29 | 19 |

| MV ref (pre) | 平均        | 標準偏差     | p値    | F検定 p値 |
|--------------|-----------|----------|-------|--------|
| A            | 2.562     | 0.419683 | 0.274 | 0.136  |
| B            | 2.443333  | 0.303765 |       |        |
| MV MLD (pre) |           |          |       |        |
| A            | 0.6363333 | 0.464962 | 0.889 | 0.241  |
| B            | 0.6533333 | 0.360643 |       |        |
| MV %DS (pre) |           |          |       |        |
| A            | 75.48639  | 16.23888 | 0.678 | 0.299  |
| B            | 73.70452  | 12.97093 |       |        |
| MV LL (pre)  |           |          |       |        |
| A            | 18.594    | 7.827307 | 0.961 | 0.6    |
| B            | 18.6981   | 6.977182 |       |        |
| SB ref (pre) |           |          |       |        |
| A            | 1.839     | 0.379058 | 0.563 | 0.159  |
| B            | 1.782381  | 0.279229 |       |        |
| SB MLD (pre) |           |          |       |        |
| A            | 0.673     | 0.41987  | 0.745 | 0.116  |
| B            | 0.6380952 | 0.298507 |       |        |
| SB %DS (pre) |           |          |       |        |
| A            | 64.16427  | 19.63714 | 1     | 0.354  |
| B            | 64.16383  | 16.0677  |       |        |
| SB LL (pre)  |           |          |       |        |
| A            | 8.422     | 4.010861 | 0.1   | 0.27   |
| B            | 6.665714  | 3.158303 |       |        |

| MV ref (post) |  | 平均       | 標準偏差     | p値    | F検定 p値 |
|---------------|--|----------|----------|-------|--------|
| A             |  | 2.774333 | 0.400015 | 0.081 | 0.201  |
| B             |  | 2.59     | 0.303183 |       |        |
| MV MLD (post) |  |          |          |       |        |
| A             |  | 2.501    | 0.395643 | 0.053 | 0.273  |
| B             |  | 2.295714 | 0.312083 |       |        |
| MV %DS (post) |  |          |          |       |        |
| A             |  | 9.912187 | 4.445931 | 0.344 | 0.102  |
| B             |  | 11.33275 | 6.185932 |       |        |
|               |  |          |          |       |        |
| SB ref (post) |  |          |          |       |        |
| A             |  | 1.915    | 0.414211 | 0.599 | 0.0305 |
| B             |  | 1.860952 | 0.257525 |       |        |
| SB MLD (post) |  |          |          |       |        |
| A             |  | 1.334667 | 0.552597 | 0.368 | 0.141  |
| B             |  | 1.20619  | 0.401404 |       |        |
| SB %DS (post) |  |          |          |       |        |
| A             |  | 31.65472 | 20.23411 | 0.591 | 0.788  |
| B             |  | 34.83819 | 21.28266 |       |        |

|                      | Univariate |                         |         | Multivariate |               |        |
|----------------------|------------|-------------------------|---------|--------------|---------------|--------|
|                      | OR         | 95%CI                   | P       | OR           | 95%CI         | P      |
| Category             | 1.163121   | 0.2930602 - 4.5039994   | 1       |              |               |        |
| Lesion prep          | 1.6789     | 0.4147585 - 6.7204887   | 0.5294  |              |               |        |
| MV calc              | 9.648699   | 1.209669 - 449.438347   | 0.01937 | 8.74         | 0.994 - 76.90 | 0.0506 |
| SB RVD $\geq$ 1.79mm | 0.2877913  | 0.05625479 - 1.19508762 | 0.07128 |              |               |        |
| SB MLD $\leq$ 0.54mm | 2.761174   | 0.7121058- 11.6569239   | 0.1314  |              |               |        |
| LL $\geq$ 8.65mm     | 4.198205   | 1.029026 - 18.479538    | 0.0271  | 3.77         | 0.99 - 14.4   | 0.0518 |

|               | オッズ比   | 95%信頼区間下限 | 95%信頼区間上限 | P値      |
|---------------|--------|-----------|-----------|---------|
| (Intercept)   | 0.0475 | 0.00561   | 0.402     | 0.00519 |
| MV.calc[T. +] | 8.7400 | 0.99400   | 76.900    | 0.05060 |
| LL.8.65[T. +] | 3.7700 | 0.99000   | 14.400    | 0.05180 |

SB RVD 曲線下面積 0.719 95%信頼区間 0.568 - 0.87

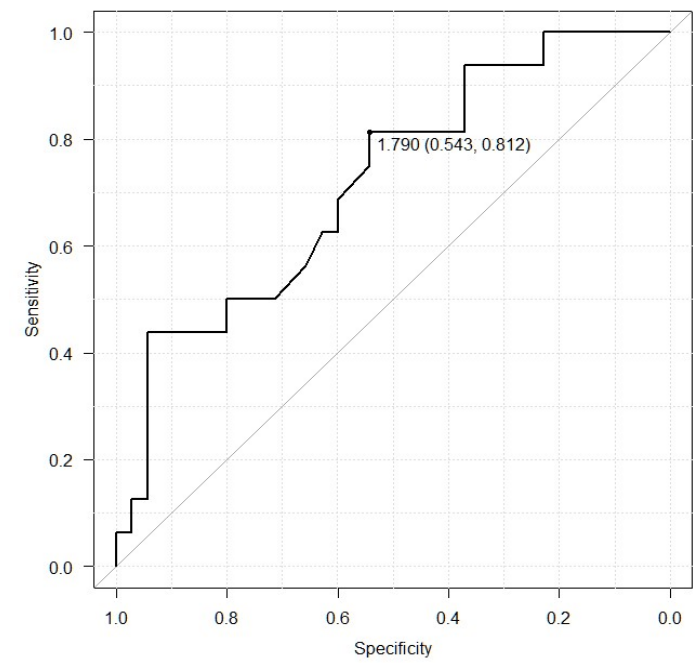

SB MLD 曲線下面積 0.664 95%信頼区間 0.514 - 0.814

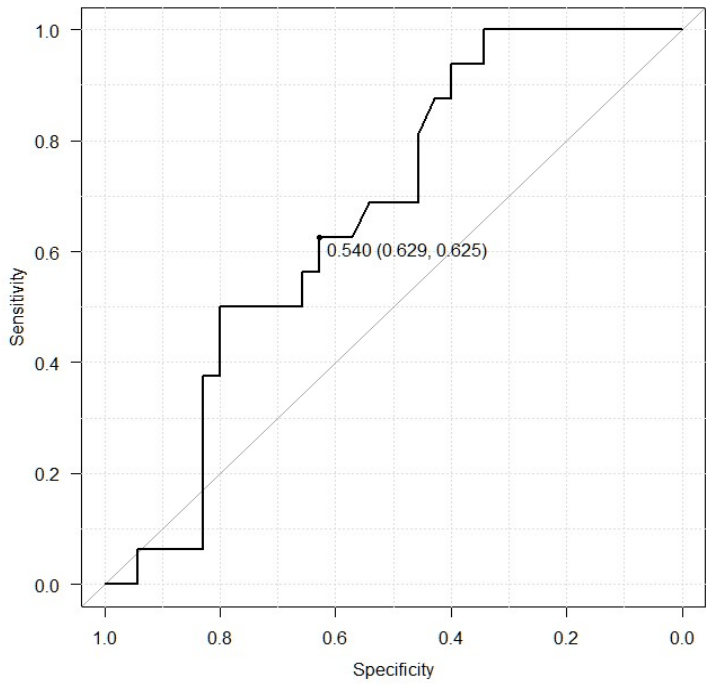

SB LL 曲線下面積 0.678 95%信頼区間 0.521 - 0.834

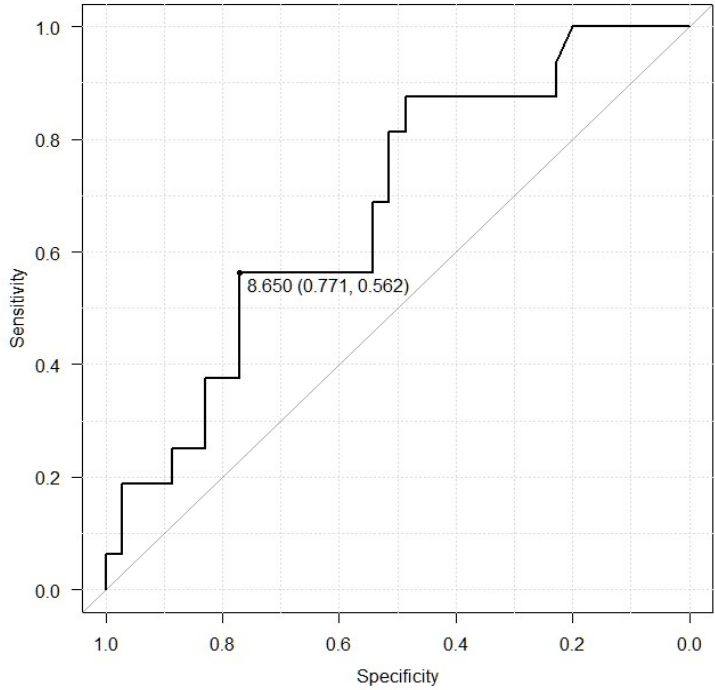

Supplement: f1 [file 8839897.f1.zip]
