# Supplementary material for: Inflation Pressure in Side Branch during Modified Jailed Balloon Technique Does Not Affect Side Branch Outcomes
Source: Hindawi journal article supplement (doi:10.1155/2021/8839897), 2021-02-18
Supplement: f1 [file 8839897.f1.zip]

| No. | Date       | Age | Sex | ACS | Lesion  | Medina | MV calc | GC size | Image     | Lesion prep (MV)  | Lesion prep (SB) | pre KBT | MV stent                | Jailed balloon  | Pressure (MV/SB) | Inf. Time | Recross GW      | Ext. St. Dil. | SB balloon                 | MV balloon |
|-----|------------|-----|-----|-----|---------|--------|---------|---------|-----------|-------------------|------------------|---------|-------------------------|-----------------|------------------|-----------|-----------------|---------------|----------------------------|------------|
| 1   | 2018/11/26 | 84  | M   |     | LAD-D2  | 1,1,1  | +       | 6Fr     | Alta      | Wolverine 2.5/10  | –                | –       | SYNERGY 2.75/20         | Regnam 1.5/12   | 12atm/12atm      | 2         | Sion            | –             | SC 1.5/15                  | NC 2.75/15 |
| 2   | 2018/12/23 | 71  | M   | ACS | LAD-LCX | 1,1,1  | +       | 7Fr     | Opti      | NC 3.0/15         | –                | –       | Xience 3.5/15           | Ryurei 2.0/20   | 12atm/12atm      | 1         | Sion            | –             | SC 2.0/20                  | NC 3.5/15  |
| 3   | 2018/12/28 | 81  | M   |     | LAD-D1  | 1,0,1  | +       | 6Fr     | OCT       | SC 2.5/15         | –                | –       | SYNERGY 3.0/20          | Regnam 1.5/12   | 12atm/12atm      | 3         | Fielder FC      | –             | SC 2.5/12                  | NC 3.25/15 |
| 4   | 2019/1/1   | 77  | M   | ACS | LAD-D1  | 0,1,1  | +       | 6Fr     | Alta      | Wolverine 3.0/10  | –                | –       | Ultimaster3.0/24        | Regnam 1.5/12   | 12atm/12atm      | 2         | Fielder FC      | –             | SC 2.0/20                  | NC 3.5/15  |
| 5   | 2019/1/7   | 50  | M   | ACS | LAD-D2  | 1,1,1  | +       | 6Fr     | Alta      | SC 2.75/15        | –                | –       | SYNERGY 3.0/28          | Regnam 1.5/12   | 10atm/10atm      | 2         | Fielder FC      | –             | SC 2.0/15                  | NC 3.0/15  |
| 6   | 2019/1/29  | 93  | M   | ACS | LAD-D2  | 1,1,1  | +       | 7Fr     | Alta      | SC 2.5/15         | SC 2.0/20        | +       | SYNERGY 3.0/24          | Regnam 1.5/12   | 12atm/12atm      | 3         | Sion black      | –             | SC 2.0/20                  | NC 3.25/15 |
| 7   | 2019/1/30  | 42  | M   | ACS | LAD-HL  | 1,1,1  | –       | 7Fr     | Opti      | SC 3.0/15         | SC 2.0/15        | +       | SYNERGY 4.0/32          | Regnam 2.0/15   | 10atm/10atm      | 1         | Fielder FC      | –             | SC 3.0/15                  | NC 3.75/15 |
| 8   | 2019/2/1   | 70  | M   |     | LAD-D1  | 1,1,1  | +       | 6Fr     | Alta      | Wolverine 2.75/10 | SC 1.5/15        | –       | Xience 3.0/38           | Regnam 1.5/12   | 12atm/12atm      | 1         | Sion black      | –             | SC 1.5/12                  | NC 3.5/15  |
| 9   | 2019/4/8   | 80  | M   |     | LAD-D1  | 0.1.1  | –       | 6Fr     | OCT       | SC 2.5/15         | –                | –       | Xience 3.0/33           | Regnam 1.5/12   | 12atm/8atm       | 2         | Fielder FC      | –             | SC 1.5/12                  | NC 3.0/16  |
| 10  | 2019/6/28  | 89  | F   |     | RCA-RV  | 1,1,1  | –       | 6Fr     | OCT       | SC 2.0/15         | –                | –       | Orsiro 2.25/26          | Regnam 1.5/12   | 12atm/6atm       | 2         | Fielder FC      | –             | SC 2.5/6                   | NC 2.5/16  |
| 11  | 2019/7/23  | 50  | M   |     | LAD-D2  | 0.1.1  | –       | 6Fr     | OCT       | Wolverine 2.25/10 | –                | –       | Orsiro 2.5/22           | Regnam 1.5/12   | 12atm/6atm       | 2         | Fielder FC      | –             | –                          | –          |
| 12  | 2019/8/5   | 99  | M   |     | LAD-D1  | 0,1,1  | +       | 6Fr     | Opti      | Wolverine 2.5/10  | –                | –       | SYNERGY 3.0/38          | Regnam 1.5/12   | 11atm/11atm      | 3         | Fielder FC      | –             | SC 1.5/12                  | NC 3.0/16  |
| 13  | 2019/8/5   | 75  | F   |     | LAD-D2  | 1,1,1  | +       | 6Fr     | Alta      | NSE 2.5/13        | SC 1.5/10        | –       | BIOFREEDOM 3.0/28       | Sapphire 1.5/10 | 6atm/6atm        | 3         | XT-R            | –             | balloon not crossed        | NC 3.0/15  |
| 14  | 2019/8/15  | 84  | M   |     | LAD-D2  | 1,1,1  | +       | 6Fr     | Alta      | NC 2.75/10        | SC 2.5/10        | –       | SYNERGY 2.5/24          | Ikazuchi 2.5/10 | 11atm/6atm       | 3         | Fielder FC      | –             | SC 2.5/10                  | NC 2.75/10 |
| 15  | 2019/8/22  | 70  | M   | ACS | LAD-D1  | 1,1,1  | +       | 6Fr     | Alta      | SC 2.5/15         | –                | –       | SYNERGY 3.0/28          | Regnam 1.5/12   | 12atm/6atm       | 2         | Fielder FC      | –             | SC 2.5/6                   | NC 3.25/16 |
| 16  | 2019/9/5   | 62  | M   |     | LAD-D2  | 1,1,1  | +       | 6Fr     | Alta      | Wolverine 2.75/10 | –                | –       | SYNERGY 3.0/38          | Regnam 1.5/12   | 11atm/11atm      | 3         | Fielder FC      | –             | SC 1.5/12                  | NC 3.0/15  |
| 17  | 2019/9/13  | 63  | M   |     | LAD-D1  | 1,1,0  | +       | 6Fr     | Opti      | SC 2.75/15        | –                | –       | Orsiro 3.0/30           | Regnam 1.5/12   | 12atm/6atm       | 2         | Fielder FC      | –             | –                          | NC 3.5/15  |
| 18  | 2019/10/10 | 84  | M   |     | LCX-PL  | 1,1,1  | –       | 6Fr     | Navifocus | SC 2.0/10         | SC 2.0/10        | –       | R-Onyx 2.5/26           | Regnam 1.5/12   | 12atm/12atm      | 2         | Fielder FC      | –             | SC 1.5/12                  | SC 2.5/15  |
| 19  | 2019/10/11 | 59  | F   |     | LCX-OM  | 1,0,1  | +       | 6Fr     | Opti      | Wolverine 2.75/10 | –                | –       | Xience 2.75/15          | Regnam 1.5/12   | 12atm/6atm       | 2         | Fielder FC      | –             | SC 1.5/15                  | NC 2.5/10  |
| 20  | 2019/10/23 | 73  | M   |     | LAD-D1  | 1,0,1  | +       | 6Fr     | Alta      | Wolverine 3.0/10  | SC 2.0/15        | –       | Orsiro 3.0/40           | Regnam 2.0/15   | 12atm/8atm       | 2         | Fielder FC      | –             | –                          | NC 3.0/15  |
| 21  | 2019/10/24 | 62  | M   |     | LAD-D1  | 1,0,1  | +       | 6Fr     | Opti      | SC 2.5/15         | –                | –       | Orsiro 3.0/30           | Regnam 2.0/12   | 8atm/8atm        | 2         | Wizard78        | +             | SC 2.0/20→Wolverine 2.0/10 | NC 3.0/15  |
| 22  | 2019/11/1  | 59  | M   |     | LAD-D2  | 1,1,1  | –       | 6Fr     | Alta      | SC 2.75/15        | –                | –       | Xience 3.0/38           | Regnam 1.5/12   | 11atm/6atm       | 3         | Fielder FC      | –             | SC 1.5/12                  | NC 3.0/15  |
| 23  | 2019/11/22 | 71  | M   | ACS | LAD-D2  | 1,1,1  | +       | 6Fr     | Alta      | SC 2.5/15         | SC 2.0/15        | –       | UM Tansei 3.0/33        | Regnam 2.0/15   | 9atm/6atm        | 2         | Fielder FC      | –             | SC 2.0/15                  | NC 3.0/15  |
| 24  | 2019/11/28 | 72  | M   | ACS | LAD-D1  | 1,1,1  | –       | 6Fr     | Alta      | Wolverine 3.0/10  | –                | –       | Xience 4.0/28           | Regnam 2.0/12   | 12atm/6atm       | 2         | Sion black      | –             | SC 2.0/12                  | NC 4.0/15  |
| 25  | 2019/12/9  | 73  | F   |     | LAD-D1  | 1,0,1  | +       | 6Fr     | OCT       | Wolverine 2.5/10  | SC 1.5/12        | –       | Xience Sierra 2.5/18    | Regnam 1.5/12   | 6atm/6atm        | 3         | Fielder FC      | –             | SC 1.5/12                  | NC 2.75/15 |
| 26  | 2019/12/11 | 84  | F   |     | LAD-D1  | 1,0,1  | +       | 6Fr     | Alta      | Wolverine 2.5/10  | SC 1.5/12        | –       | SYNERGY 2.5/38          | Regnam 1.5/12   | 12atm/12atm      | 3         | Fielder FC      | –             | SC 1.5/12                  | NC 2.5/15  |
| 27  | 2020/1/7   | 90  | F   |     | LAD-D1  | 1,1,1  | +       | 6Fr     | Alta      | Wolverine 2.5/10  | –                | –       | Xience Sierra 2.5/33    | Regnam 2.0/12   | 9atm/6atm        | 3         | Fielder FC      | –             | SC 2.0/12                  | NC 2.75/15 |
| 28  | 2020/1/14  | 79  | F   |     | LAD-D2  | 1,1,1  | +       | 6Fr     | EagleEye  | Wolverine 2.5/10  | SC 2.0/15        | –       | Orsiro 2.5/18           | Ignis 2.0/15    | 8atm/0atm        | 2         | Fielder FC      | –             | SC 2.0/15                  | NC 2.5/15  |
| 29  | 2020/1/24  | 72  | M   |     | LM bif. | 0,1,1  | +       | 7Fr     | OCT       | NSE 3.0/13        | NC 2.75/15       | –       | SYNERGY 3.0/20          | Regnam 2.75/12  | 11atm/11atm      | 3         | Fielder FC      | –             | SC 2.75/12                 | NC 3.25/15 |
| 30  | 2020/1/29  | 81  | M   |     | LAD-D1  | 1,1,1  | +       | 6Fr     | Alta      | Wolverine 3.0/10  | SC 2.0/12        | –       | SYNERGY 3.0/12          | Regnam 2.0/12   | 11atm/6atm       | 3         | Fielder FC      | –             | SC 2.0/12                  | NC 3.0/12  |
| 31  | 2020/1/31  | 61  | M   |     | LAD-D1  | 0,1,1  | –       | 6Fr     | OCT       | NSE 2.75/13       | –                | –       | UM Tansei 2.75/18       | Regnam 1.5/12   | 10atm/6atm       | 3         | Fielder FC      | –             | SC 1.5/12                  | NC 3.0/15  |
| 32  | 2020/2/6   | 77  | M   |     | LAD-D1  | 1,1,1  | +       | 6Fr     | OCT       | NC 2.5/16         | –                | –       | Orsiro 3.0/18           | Regnam 1.5/12   | 12atm/6atm       | 3         | FC not cross    | –             | –                          | –          |
| 33  | 2020/2/25  | 71  | M   |     | LAD-D1  | 0,1,1  | +       | 6Fr     | Alta      | Wolverine 2.75/10 | NSE 2.0/13       | –       | UM Tansei 3.0/33        | Regnam 1.5/12   | 12atm/8atm       | 3         | Fielder FC      | –             | –                          | NC 3.25/16 |
| 34  | 2020/3/10  | 90  | F   |     | LAD-D1  | 0,1,1  | +       | 6Fr     | Opti      | Wolverine 2.5/10  | –                | –       | UM Tansei 2.5/33        | Regnam 1.5/12   | 10atm/10atm      | 2         | Fielder FC      | –             | SC 1.5/12                  | NC 3.5/15  |
| 35  | 2020/3/11  | 72  | F   |     | LAD-D1  | 1,1,1  | +       | 6Fr     | Alta      | Wolverine 2.5/10  | –                | –       | R-Onyx 2.5/22           | Regnam 1.5/12   | 14atm/6atm       | 3         | Fielder FC      | –             | SC 1.5/12                  | NC 2.5/15  |
| 36  | 2020/3/19  | 86  | M   |     | LAD-D2  | 0,1,1  | –       | 6Fr     | Alta      | SC 2.5/30         | SC 2.0/20        | –       | SYNERGY 3.0/24          | Regnam 1.5/12   | 11atm/11atm      | 3         | Fielder FC      | –             | balloon not crossed        | NC 3.0/15  |
| 37  | 2020/4/3   | 84  | M   |     | LAD-D1  | 1,1,1  | +       | 6Fr     | Alta      | Wolverine 2.75/10 | –                | –       | Xience Sierra 3.0/33    | Regnam 1.5/12   | 12atm/0atm       | 3         | Fielder FC      | –             | –                          | NC 3.0/15  |
| 38  | 2020/4/9   | 72  | M   | ACS | LAD-D3  | 1,1,1  | –       | 7Fr     | Alta      | SC 2.0/15         | SC 2.0/15        | –       | Orsiro 2.5/30           | Regnam 1.5/12   | 8atm/8atm        | 2         | Fielder FC      | –             | SC 1.5/12                  | NC 2.25/15 |
| 39  | 2020/4/23  | 79  | M   |     | LCX-OM  | 0,1,1  | +       | 6Fr     | OCT       | Wolverine 2.5/10  | –                | –       | Xience Sierra 2.75/15   | Regnam 1.5/12   | 12atm/12atm      | 3         | Fielder FC      | –             | SC 1.75/10                 | NC 2.75/15 |
| 40  | 2020/4/28  | 46  | M   | ACS | LAD-D3  | 1,1,1  | –       | 6Fr     | Alta      | Wolverine 2.5/10  | –                | –       | UM Tansei 2.5/21        | Regnam 1.5/12   | 9atm/0atm        | 3         | Fielder FC      | –             | –                          | NC 3.0/15  |
| No. | Date       | Age | Sex |     | Lesion  | Medina | MV calc | GC size | Image     | Lesion prep (MV)  | Lesion prep (SB) | pre KBT | MV stent                | Jailed balloon  | Pressure (MV/SB) | Inf. Time | Recross GW      | Ext. St. Dil. | SB balloon                 | MV balloon |
| 41  | 2020/6/3   | 64  | M   |     | LAD-D2  | 1,1,1  | +       | 6Fr     | OCT       | NSE 2.75/13       | SC 2.0/15        | –       | Xience Sierra 3.0/18    | ZINRAI 1.5/10   | 12atm/12atm      | 3         | Sion black      | –             | –                          | NC 3.25/15 |
| 42  | 2020/6/25  | 81  | M   |     | LAD-D1  | 1,1,1  | +       | 6Fr     | Alta      | SC 2.5/15         | SC 2.0/12        | +       | Xience Sierra 2.75/15   | Regnam 2.0/12   | 12atm/6atm       | 3         | Fielder FC      | –             | –                          | NC 2.75/12 |
| 43  | 2020/9/1   | 76  | M   |     | LAD-D1  | 1,1,0  | +       | 6Fr     | OFDI      | Wolverine 2.5/10  | –                | –       | SYNERGY 2.5/24          | Regnam 2.5/15   | 11atm/11atm      | 3         | Gaia next1      | –             | SC 2.5/15                  | NC 2.75/12 |
| 44  | 2020/9/4   | 71  | F   |     | LAD-D1  | 1,1,1  | –       | 6Fr     | OCT       | Wolverine 2.5/10  | –                | –       | UM Tansei 2.75/12       | Regnam 1.5/12   | 9atm/9atm        | 3         | black not cross | –             | –                          | NC 2.75/10 |
| 45  | 2020/9/8   | 71  | M   |     | LAD-D2  | 1,1,1  | –       | 6Fr     | NIRS      | Wolverine 2.5/10  | –                | –       | Xience Sierra 3.0/28    | Regnam 1.5/12   | 12atm/12atm      | 3         | Fielder FC      | –             | –                          | NC 3.0/15  |
| 46  | 2020/9/21  | 74  | F   | ACS | LAD-D1  | 0,0,1  | –       | 7Fr     | Alta      | –                 | –                | –       | R-Onyx 3.5/18           | Regnam 1.5/12   | 12atm/12atm      | 3         | Fielder FC      | –             | SC 1.5/12                  | NC 3.5/15  |
| 47  | 2020/10/2  | 85  | F   |     | LAD-D1  | 1,1,1  | +       | 6Fr     | OCT       | Wolverine 2.5/10  | –                | –       | Xience Sierra 2.75/18   | ZINRAI 1.5/10   | 14atm/14atm      | 2         | Fielder FC      | –             | SC 1.5/10                  | NC 2.75/16 |
| 48  | 2020/10/21 | 80  | M   |     | LAD-D2  | 1,1,1  | +       | 6Fr     | Alta      | Wolverine 2.75/10 | –                | –       | SYNERGY 3.0/32          | Regnam 1.5/12   | 11atm/11atm      | 3         | Fielder FC      | –             | –                          | NC 3.25/16 |
| 49  | 2020/11/14 | 65  | M   | ACS | RCA-RV  | 1,1,1  | –       | 7Fr     | Alta      | –                 | –                | –       | Xience Sierra 3.5/30    | Regnam 1.5/12   | 12atm/12atm      | 3         | Fielder FC      | –             | SC 1.5/15                  | NC 3.5/15  |
| 50  | 2020/12/11 | 64  | M   | ACS | LAD-D1  | 1,1,1  | +       | 7Fr     | Alta      | SC 2.75/15        | –                | –       | Xience Skypoint 3.25/28 | Regnam 2.0/12   | 12atm/12atm      | 3         | Sion black      | –             | SC 2.0/12                  | NC 3.5/15  |
| 51  | 2020/12/18 | 61  | F   |     | LAD-D1  | 1,1,1  | +       | 6Fr     | Alta      | SC 3.0/15         | –                | –       | UM Tansei 2.5/28        | Regnam 1.5/12   | 9atm/9atm        | 3         | Fielder FC      | –             | SC 2.25/15                 | NC 2.75/15 |
| No. | Date       | Age | Sex |     | Lesion  | Medina | MV calc | GC size | Image     | Lesion prep (MV)  | Lesion prep (SB) | pre KBT | MV stent                | Jailed balloon  | Pressure (MV/SB) | Inf. Time | Recross GW      | Ext. St. Dil. | SB balloon                 | MV balloon |

|     |           | SB Outcomes                              |            |            |                   |                     | QCA pre procedure |        |        |          |       |        |        |          | QCA post procedure |        |        |          |        |
|-----|-----------|------------------------------------------|------------|------------|-------------------|---------------------|-------------------|--------|--------|----------|-------|--------|--------|----------|--------------------|--------|--------|----------|--------|
| KBT | POT       | SB compromise                            | dissection | dis        | stenosis-increase | SB flow disturbance | SB final TIMI     | MV ref | MV MLD | MV %DS   | LL    | SB ref | SB MLD | SB %DS   | LL                 | MV ref | MV MLD | MV %DS   | SB ref |
| +   | –         |                                          | –          | –          | –                 | 3                   | 3                 | 2.28   | 0.64   | 71.92982 | 12.63 | 1.65   | 0.31   | 81.21212 | 11.75              | 2.9    | 2.6    | 10.34483 | 1.67   |
| +   | NC 4.0/15 |                                          | –          | –          | –                 | 3                   | 3                 | 3.39   | 0.89   | 73.74631 | 12.14 | 2.11   | 0.99   | 53.08057 | 16.6               | 3.36   | 3.2    | 4.761905 | 3.06   |
| +   | –         |                                          | –          | –          | –                 | 3                   | 3                 | 2.56   | 0.73   | 71.48438 | 18.85 | 1.58   | 0.75   | 52.53165 | 11.29              | 2.98   | 2.77   | 7.04698  | 1.6    |
| –   | –         | dis grade 2 (ostium)                     | +          | dis (os)   | –                 | 3                   | 3                 | 2.77   | 0.57   | 79.42238 | 20.06 | 1.51   | 0.34   | 77.48344 | 6.43               | 3.07   | 2.76   | 10.09772 | 1.53   |
| +   | –         |                                          | –          | –          | –                 | 3                   | 3                 | 2.02   | 0.45   | 77.72277 | 15.87 | 1.56   | 0.58   | 62.82051 | 7.36               | 2.15   | 2.02   | 6.046512 | 1.45   |
| +   | –         |                                          | –          | –          | –                 | 3                   | 3                 | 2.75   | 0.01   | 99.63636 | 16    | 1.36   | 0.01   | 99.26471 | 8.47               | 2.85   | 2.71   | 4.912281 | 1.55   |
| +   | NC 5.0/8  |                                          | –          | –          | –                 | 3                   | 3                 | 3.35   | 0.71   | 78.80597 | 16.92 | 2.36   | 1.31   | 44.49153 | 10.03              | 3.65   | 3.3    | 9.589041 | 2.45   |
| –   | –         | dis grade 2 (distal edge)                | +          | dis (dis)  | –                 | 3                   | 3                 | 2.93   | 0.36   | 87.71331 | 29.53 | 1.91   | 0.41   | 78.53403 | 19.59              | 3.11   | 2.41   | 22.50804 | 1.9    |
| +   | –         |                                          | –          | –          | –                 | 3                   | 3                 | 2.72   | 0.71   | 73.89706 | 24.97 | 1.76   | 0.4    | 77.27273 | 9.49               | 2.93   | 2.83   | 3.412969 | 1.88   |
| –   | –         |                                          | –          | –          | –                 | 3                   | 3                 | 2.19   | 0.36   | 83.56164 | 15.55 | 1.67   | 0.49   | 70.65868 | 3.21               | 2.24   | 2.01   | 10.26786 | 1.69   |
| –   | NC 2.75/8 |                                          | –          | –          | –                 | 3                   | 3                 | 2.37   | 0.61   | 74.2616  | 16.1  | 1.63   | 0.56   | 65.64417 | 8.35               | 2.54   | 2.34   | 7.874016 | 1.73   |
| +   | –         | stenosis increase                        | –          | –          | +                 | 3                   | 3                 | 1.98   | 0.51   | 74.24242 | 25    | 1.79   | 0.73   | 59.21788 | 3.99               | 2.38   | 2.03   | 14.70588 | 1.79   |
| –   | –         | stenosis increase                        | –          | –          | +                 | 3                   | 2                 | 2.27   | 0.62   | 72.68722 | 23.67 | 1.39   | 0.34   | 75.53957 | 9.2                | 2.29   | 1.98   | 13.53712 | 1.38   |
| +   | –         | dis grade 2 (body)                       | +          | dis (body) | –                 | 3                   | 3                 | 1.91   | 0.23   | 87.95812 | 21.19 | 1.54   | 0.39   | 74.67532 | 9.72               | 2.21   | 1.74   | 21.26697 | 1.93   |
| +   | –         | stenosis increase                        | +          | dis (os)   | +                 | 3                   | 3                 | 2.55   | 0.52   | 79.60784 | 14.59 | 1.59   | 0.54   | 66.03774 | 15.35              | 2.86   | 2.39   | 16.43357 | 1.65   |
| +   | –         |                                          | –          | –          | –                 | 3                   | 3                 | 2.53   | 0.87   | 65.61265 | 30.83 | 2.05   | 1.18   | 42.43902 | 6.74               | 2.75   | 2.67   | 2.909091 | 2.06   |
| –   | –         |                                          | –          | –          | –                 | 3                   | 3                 | 2.91   | 1.52   | 47.76632 | 26.27 | 1.8    | 1.5    | 16.66667 | 1.88               | 2.69   | 2.42   | 10.03717 | 1.94   |
| +   | –         |                                          | –          | –          | –                 | 3                   | 3                 | 2.12   | 0.22   | 89.62264 | 22.71 | 2.62   | 0.43   | 83.58779 | 3.01               | 2.54   | 2.24   | 11.81102 | 2.3    |
| –   | –         | dis grade 2 (ostium)                     | +          | dis (os)   | –                 | (+)                 | 3                 | 2.19   | 0.7    | 68.03653 | 9.14  | 1.32   | 0.5    | 62.12121 | 7.33               | 2.23   | 2.16   | 3.139013 | 1.26   |
| –   | –         |                                          | –          | –          | –                 | 3                   | 3                 | 2.74   | 1.37   | 50       | 33.2  | 1.87   | 0.49   | 73.79679 | 4.41               | 2.77   | 2.14   | 22.74368 | 1.96   |
| –   | –         | dis grade 2 (ostium)                     | +          | dis (os)   | –                 | (+)                 | 3                 | 2.6    | 1.27   | 51.15385 | 23.27 | 1.49   | 0.41   | 72.48322 | 8.88               | 2.97   | 2.66   | 10.43771 | 1.93   |
| +   | –         |                                          | –          | –          | –                 | 3                   | 3                 | 2.48   | 0.68   | 72.58065 | 20.29 | 2.32   | 0.76   | 67.24138 | 2.58               | 2.57   | 2.02   | 21.40078 | 2.14   |
| –   | –         |                                          | –          | –          | –                 | 3                   | 3                 | 2.46   | 0.89   | 63.82114 | 24.87 | 2.06   | 0.62   | 69.90291 | 8.45               | 2.64   | 2.04   | 22.72727 | 2.14   |
| +   | –         |                                          | –          | –          | –                 | 3                   | 3                 | 3.03   | 0.41   | 86.46865 | 19.87 | 1.76   | 1.1    | 37.5     | 5.78               | 3.28   | 3.06   | 6.707317 | 1.94   |
| +   | –         | dis grade 2 (ostium)                     | +          | dis (os)   | –                 | 3                   | 3                 | 2.02   | 0.51   | 74.75248 | 15.53 | 1.41   | 0.38   | 73.04965 | 8.65               | 2.56   | 2.16   | 15.625   | 1.5    |
| +   | –         |                                          | –          | –          | –                 | 3                   | 3                 | 2.22   | 0.19   | 91.44144 | 28.83 | 1.63   | 0.62   | 61.96319 | 5.54               | 2.25   | 2.03   | 9.777778 | 1.57   |
| +   | –         | dis grade 2 (ostium) + stenosis increase | +          | dis (os)   | +                 | 3                   | 3                 | 2.32   | 0.38   | 83.62069 | 30.86 | 1.73   | 0.83   | 52.02312 | 4.32               | 2.76   | 2.48   | 10.14493 | 2.26   |
| –   | –         |                                          | –          | –          | –                 | 3                   | 3                 | 2.33   | 0.82   | 64.80687 | 13.2  | 1.87   | 0.21   | 88.77005 | 8.07               | 2.34   | 2.28   | 2.564103 | 1.98   |
| +   | NC 4.5/6  |                                          | –          | –          | –                 | 3                   | 3                 | 3.21   | 0.9    | 71.96262 | 10.51 | 3.05   | 1.7    | 44.2623  | 8.17               | 3.53   | 3.29   | 6.798867 | 3.04   |
| –   | –         | dis grade 2 (distal edge)                | +          | dis (dis)  | –                 | (+)                 | 3                 | 2.82   | 0.67   | 76.24113 | 10.91 | 2.01   | 0.78   | 61.19403 | 10                 | 2.97   | 2.65   | 10.77441 | 1.91   |
| +   | –         |                                          | –          | –          | –                 | 3                   | 3                 | 2.47   | 1.28   | 48.17814 | 13.82 | 2.31   | 0.82   | 64.50216 | 5.09               | 2.5    | 2.3    | 8        | 2.17   |
| –   | NC 3.25/8 |                                          | –          | –          | –                 | 3                   | 3                 | 2      | 0.69   | 65.5     | 12.51 | 1.83   | 0.96   | 47.54098 | 4.93               | 2.04   | 1.87   | 8.333333 | 1.9    |
| –   | –         |                                          | –          | –          | –                 | 3                   | 3                 | 2.74   | 0.54   | 80.29197 | 27    | 1.4    | 0.24   | 82.85714 | 7.83               | 2.8    | 2.48   | 11.42857 | 1.44   |
| –   | –         |                                          | –          | –          | –                 | 3                   | 3                 | 2.29   | 0.36   | 84.27948 | 30.66 | 1.55   | 1.16   | 25.16129 | 2.47               | 2.83   | 2.49   | 12.01413 | 1.65   |
| +   | –         | dis grade 2 (body)                       | +          | dis (body) | –                 | 3                   | 3                 | 2.12   | 0.35   | 83.49057 | 17.46 | 1.52   | 0.58   | 61.84211 | 7.81               | 2.5    | 2.25   | 10       | 1.56   |
| –   | –         |                                          | –          | –          | –                 | 3                   | 3                 | 2.69   | 0.33   | 87.73234 | 20.71 | 1.62   | 0.55   | 66.04938 | 8.2                | 2.78   | 2.49   | 10.43165 | 1.66   |
| –   | –         |                                          | –          | –          | –                 | 3                   | 3                 | 2.14   | 0.28   | 86.91589 | 19.08 | 1.55   | 0.43   | 72.25806 | 3.99               | 2.71   | 2.39   | 11.80812 | 1.55   |
| +   | –         |                                          | –          | –          | –                 | 3                   | 3                 | 2.07   | 0.25   | 87.92271 | 23.23 | 1.69   | 0.31   | 81.6568  | 5.33               | 2.26   | 2.13   | 5.752212 | 1.68   |
| +   | –         |                                          | –          | –          | –                 | 3                   | 3                 | 2.06   | 0.43   | 79.12621 | 4.76  | 2.04   | 1.34   | 34.31373 | 2.58               | 2.24   | 1.91   | 14.73214 | 2.14   |
| –   | –         |                                          | –          | –          | –                 | 3                   | 3                 | 2.28   | 0.28   | 87.7193  | 10.64 | 2.24   | 0.48   | 78.57143 | 3.81               | 2.25   | 2      | 11.11111 | 2.02   |
| KBT | POT       | SB compromise                            | dissection | dis        | stenosis-increase | SB flow disturbance | SB final TIMI     | MV ref | MV MLD | MV %DS   | LL    | SB ref | SB MLD | SB %DS   | LL                 | MV ref | MV MLD | MV %DS   | SB ref |
| –   | –         | dis grade 2 (body)                       | +          | dis (body) | –                 | 3                   | 3                 | 2.91   | 0.54   | 81.4433  | 13.26 | 2.09   | 0.1    | 95.21531 | 11.16              | 2.9    | 2.69   | 7.241379 | 2.32   |
| –   | –         | dis grade 2 (ostium)                     | +          | dis (os)   | –                 | 3                   | 3                 | 2.54   | 0.43   | 83.07087 | 11.14 | 1.65   | 0.72   | 56.36364 | 7.58               | 2.56   | 2.36   | 7.8125   | 2.03   |
| +   | NC 3.5/10 | stenosis increase                        | –          | –          | +                 | 3                   | 3                 | 2.48   | 1.02   | 58.87097 | 8.52  | 1.58   | 1.09   | 31.01266 | 5.43               | 2.52   | 2.18   | 13.49206 | 1.71   |
| –   | –         | dis grade 2 (ostium)                     | +          | dis (os)   | –                 | 3                   | 3                 | 2.45   | 0.74   | 69.79592 | 5.98  | 1.67   | 0.34   | 79.64072 | 7.14               | 2.49   | 2.18   | 12.4498  | 1.76   |
| –   | –         |                                          | –          | –          | –                 | 3                   | 3                 | 2.66   | 0.35   | 86.84211 | 19.94 | 1.84   | 0      | 100      | 10.68              | 2.77   | 2.66   | 3.971119 | 1.79   |
| +   | –         |                                          | –          | –          | –                 | 3                   | 3                 | 2.9    | 2.44   | 15.86207 | 2.63  | 2.07   | 0.53   | 74.39614 | 4.42               | 3.45   | 3.2    | 7.246377 | 2.2    |
| +   | –         |                                          | –          | –          | –                 | 3                   | 3                 | 2.56   | 1.17   | 54.29688 | 11.35 | 1.88   | 1.08   | 42.55319 | 5.06               | 2.75   | 2.39   | 13.09091 | 1.86   |
| –   | –         | dis grade 2 (ostium)                     | +          | dis (os)   | –                 | 3                   | 3                 | 2.71   | 1.05   | 61.25461 | 28.37 | 1.76   | 0.75   | 57.38636 | 14.54              | 2.65   | 2.37   | 10.56604 | 1.76   |
| +   | –         |                                          | –          | –          | –                 | 3                   | 3                 | 3.22   | 0.61   | 81.0559  | 24.32 | 2.08   | 0.98   | 52.88462 | 7.88               | 3.04   | 2.57   | 15.46053 | 1.94   |
| +   | –         |                                          | –          | –          | –                 | 3                   | 3                 | 2.89   | 0.12   | 95.84775 | 24.48 | 2.18   | 0.8    | 63.30275 | 12.75              | 2.91   | 2.72   | 6.52921  | 2.22   |
| +   | NC 4.0/15 |                                          | –          | –          | –                 | 3                   | 3                 | 1.97   | 0.23   | 88.32487 | 17.26 | 1.65   | 0.67   | 59.39394 | 9.32               | 2.3    | 2.22   | 3.478261 | 1.98   |
| KBT | POT       | SB compromise                            | dissection | dis        | stenosis-increase | SB flow disturbance | SB final TIMI     | MV ref | MV MLD | MV %DS   | LL    | SB ref | SB MLD | SB %DS   | LL                 | MV ref | MV MLD | MV %DS   | SB ref |

|        |          |
|--------|----------|
|        |          |
| SB MLD | SB %DS   |
| 1.04   | 37.72455 |
| 2.22   | 27.45098 |
| 1.25   | 21.875   |
| 1.17   | 23.52941 |
| 0.7    | 51.72414 |
| 1.42   | 8.387097 |
| 2.3    | 6.122449 |
| 0.83   | 56.31579 |
| 1.14   | 39.3617  |
| 1.32   | 21.89349 |
| 1.48   | 14.45087 |
| 0.54   | 69.8324  |
| 0.27   | 80.43478 |
| 1.8    | 6.735751 |
| 0.3    | 81.81818 |
| 1.84   | 10.67961 |
| 1.8    | 7.216495 |
| 1.79   | 22.17391 |
| 1.18   | 6.349206 |
| 1.19   | 39.28571 |
| 1.69   | 12.43523 |
| 1.56   | 27.1028  |
| 1.09   | 49.06542 |
| 1.54   | 20.61856 |
| 0.84   | 44       |
| 0.92   | 41.40127 |
| 0.97   | 57.07965 |
| 0.68   | 65.65657 |
| 2.72   | 10.52632 |
| 1.59   | 16.75393 |
| 1.1    | 49.30876 |
| 1.13   | 40.52632 |
| 0.61   | 57.63889 |
| 1.36   | 17.57576 |
| 1.1    | 29.48718 |
| 0.75   | 54.81928 |
| 0.89   | 42.58065 |
| 1.25   | 25.59524 |
| 1.92   | 10.28037 |
| 1.81   | 10.39604 |
| SB MLD | SB %DS   |
| 0.94   | 59.48276 |
| 1.05   | 48.27586 |
| 1.05   | 38.59649 |
| 0.96   | 45.45455 |
| 1.3    | 27.3743  |
| 1.05   | 52.27273 |
| 1.76   | 5.376344 |
| 1.2    | 31.81818 |
| 1.67   | 13.91753 |
| 1.58   | 28.82883 |
| 1.71   | 13.63636 |
| SB MLD | SB %DS   |
