# Supplementary material for: Inflation Pressure in Side Branch during Modified Jailed Balloon Technique Does Not Affect Side Branch Outcomes
Source: J Interv Cardiol. 2021 Feb 18;2021:8839897. doi: 10.1155/2021/8839897 (PMC7906823; doi:10.1155/2021/8839897)
Supplement: Supplementary Materials — Original raw data of 51 patients of this study and the results of statistical analysis based on the patients' raw data are provided. [file 8839897.f1.zip]

Archive with 2 entries (2 files):
- 8839897.f1/Analysis data.pdf
- 8839897.f1/raw data.pdf
